# Supplementary material
Source: Elsevier journal article supplement (https://www.sciencedirect.com/science/article/pii/S2530064422000748)
Supplement: mmc2 [file S2530064422000748:mmc2.xlsx]

## Sheet: Conservation 4x4
Strategic areas for conservation of species and their ecosystems
Classes	Habitat amount	Env. suitability	Fire frequency	Diversity of phytophysiognomic
Habitat amount	1	2	4	9
Env. suitability	0.5	1	3	7
Fire frequency	0.25	0.333333	1	6
Diversity of phytophysiognomic	0.111111	0.142857	0.166667	1
ok
SUM	1.86111	3.47619	8.16667	23
Normalized Criteria Matrix
Factor	C1	C2	C3	C4	Sum	Eigen Vector (Weights)	Consistency Measure
C1	0.537313	0.575342	0.489796	0.391304	1.99376	0.498439	4.20618
C2	0.268657	0.287671	0.367347	0.304348	1.22802	0.307006	4.24935
C3	0.134328	0.0958904	0.122449	0.26087	0.613537	0.153384	4.09009
C4	0.0597015	0.0410959	0.0204082	0.0434783	0.164684	0.041171	4.03136
Normalized	1	1	1	1
						n =	4
						Consistency Index (CI)	0.048082
						Saaty Index (RI)	0.9
						Consistency Ratio (CR)	0.0534244

## Sheet: Restoration 5x5
Strategic areas for ecosystem restoration
Classes	Habitat amount	Env. suitability	Fire frequency	APP amount	Diversity of phytophysiognomic
Habitat amount	1	2	4	7	9
Env. suitability	0.5	1	2	5	6
Fire frequency	0.25	0.5	1	4	6
APP amount	0.25	0.2	0.25	1	2
Diversity of phytophysiognomic	0.111111	0.166667	0.166667	0.5	1
ok
SUM	2.11111	3.86667	7.41667	17.5	24
Normalized Criteria Matrix
Factor	C1	C2	C3	C4	C5	Sum	Eigen Vector (Weights)	Consistency Measure
C1	0.473684	0.517241	0.539326	0.4	0.375	2.30525	0.46105	5.40409
C2	0.236842	0.258621	0.269663	0.285714	0.25	1.30084	0.260168	5.4027
C3	0.118421	0.12931	0.134831	0.228571	0.25	0.861134	0.172227	5.33698
C4	0.118421	0.0517241	0.0337079	0.0571429	0.0833333	0.344329	0.0688658	5.14909
C5	0.0526316	0.0431034	0.0224719	0.0285714	0.0416667	0.188445	0.037689	5.18495
Normalized	1	1	1	1	1
							n =	5
							Consistency Index (CI)	0.0738904
							Saaty Index (RI)	1.12
							Consistency Ratio (CR)	0.0659736

## Sheet: 3x3
Title
Classes	C1	C2	C3
C1	1	2	3
C2	0.5	1	4
C3	0.333333	0.25	1
ok
SUM	1.83333	3.25	8
Normalized Criteria Matrix
Factor	C1	C2	C3	Sum	Eigen Vector (Weights)	Consistency Measure
C1	0.545455	0.615385	0.375	1.53584	0.511946	3.15652
C2	0.272727	0.307692	0.5	1.08042	0.36014	3.13147
C3	0.181818	0.0769231	0.125	0.383741	0.127914	3.03797
Normalized	1	1	1
					n =	3
					Consistency Index (CI)	0.0543257
					Saaty Index (RI)	0.58
					Consistency Ratio (CR)	0.093665

## Sheet: 6x6
Title
Classes	C1	C2	C3	C4	C5	C6
C1	1	4	4	5	7	9
C2	0.25	1	2	3	5	6
C3	0.25	0.5	1	2	4	6
C4	0.2	0.333333	0.5	1	3	5
C5	0.142857	0.2	0.25	0.333333	1	2
C6	0.111111	0.166667	0.166667	0.2	0.5	1
ok
SUM	1.95397	6.2	7.91667	11.5333	20.5	29
Normalized Criteria Matrix
Factor	C1	C2	C3	C4	C5	C6	Sum	Eigen Vector (Weights)	Consistency Measure
C1	0.511779	0.645161	0.505263	0.433526	0.341463	0.310345	2.74754	0.457923	6.60154
C2	0.127945	0.16129	0.252632	0.260116	0.243902	0.206897	1.25278	0.208797	6.49643
C3	0.127945	0.0806452	0.126316	0.17341	0.195122	0.206897	0.910335	0.151722	6.25434
C4	0.102356	0.0537634	0.0631579	0.0867052	0.146341	0.172414	0.624738	0.104123	6.08713
C5	0.0731113	0.0322581	0.0315789	0.0289017	0.0487805	0.0689655	0.283596	0.047266	6.08088
C6	0.0568643	0.0268817	0.0210526	0.017341	0.0243902	0.0344828	0.181013	0.0301688	6.15183
Normalized	1	1	1	1	1	1
								n =	6
								Consistency Index (CI)	0.0557382
								Saaty Index (RI)	1.24
								Consistency Ratio (CR)	0.0449502

## Sheet: 7x7
Title
Classes	C1	C2	C3	C4	C5	C6	C7
C1	1	7	3	2	3	2	3
C2	0.142857	1	2	3	4	5	6
C3	0.333333	0.5	1	2	2	4	2
C4	0.5	0.333333	0.5	1	2	2	3
C5	0.333333	0.25	0.5	0.5	1	2	2
C6	0.5	0.2	0.25	0.5	0.5	1	3
C7	0.333333	0.166667	0.5	0.333333	0.5	0.333333	1
0.136455
SUM	3.14286	9.45	7.75	9.33333	13	16.3333	20
Normalized Criteria Matrix
Factor	C1	C2	C3	C4	C5	C6	C7	Sum	Eigen Vector (Weights)	Consistency Measure
C1	0.318182	0.740741	0.387097	0.214286	0.230769	0.122449	0.15	2.16352	0.309075	10.1423
C2	0.0454545	0.10582	0.258065	0.321429	0.307692	0.306122	0.3	1.64458	0.23494	7.97054
C3	0.106061	0.0529101	0.129032	0.214286	0.153846	0.244898	0.1	1.00103	0.143005	7.94955
C4	0.159091	0.0352734	0.0645161	0.107143	0.153846	0.122449	0.15	0.792318	0.113188	7.63919
C5	0.106061	0.026455	0.0645161	0.0535714	0.0769231	0.122449	0.1	0.549975	0.0785679	7.77509
C6	0.159091	0.021164	0.0322581	0.0535714	0.0384615	0.0612245	0.15	0.51577	0.0736815	7.45728
C7	0.106061	0.0176367	0.0645161	0.0357143	0.0384615	0.0204082	0.05	0.332797	0.0475425	7.63108
Normalized	1	1	1	1	1	1	1
									n =	7
									Consistency Index (CI)	0.180121
									Saaty Index (RI)	1.32
									Consistency Ratio (CR)	0.136455

## Sheet: 8x8
Title
Classes	C1	C2	C3	C4	C5	C6	C7	C8
C1	1	7	3	2	3	2	3	4
C2	0.142857	1	2	3	4	5	6	5
C3	0.333333	0.5	1	2	2	4	2	2
C4	0.5	0.333333	0.5	1	2	2	3	2
C5	0.333333	0.25	0.5	0.5	1	2	2	2
C6	0.5	0.2	0.25	0.5	0.5	1	3	2
C7	0.333333	0.166667	0.5	0.333333	0.5	0.333333	1	2
C8	0.25	0.2	0.5	0.5	0.5	0.5	0.5	1
0.110014
SUM	3.39286	9.65	8.25	9.83333	13.5	16.8333	20.5	20
Normalized Criteria Matrix
Factor	C1	C2	C3	C4	C5	C6	C7	C8	Sum	Eigen Vector (Weights)	Consistency Measure
C1	0.294737	0.725389	0.363636	0.20339	0.222222	0.118812	0.146341	0.2	2.27453	0.284316	11.2838
C2	0.0421053	0.103627	0.242424	0.305085	0.296296	0.29703	0.292683	0.25	1.82925	0.228656	9.0397
C3	0.0982456	0.0518135	0.121212	0.20339	0.148148	0.237624	0.097561	0.1	1.05799	0.132249	9.06556
C4	0.147368	0.0345423	0.0606061	0.101695	0.148148	0.118812	0.146341	0.1	0.857513	0.107189	8.75858
C5	0.0982456	0.0259067	0.0606061	0.0508475	0.0740741	0.118812	0.097561	0.1	0.626053	0.0782566	8.79897
C6	0.147368	0.0207254	0.030303	0.0508475	0.037037	0.0594059	0.146341	0.1	0.592029	0.0740036	8.51704
C7	0.0982456	0.0172712	0.0606061	0.0338983	0.037037	0.019802	0.0487805	0.1	0.415641	0.0519551	8.41564
C8	0.0736842	0.0207254	0.0606061	0.0508475	0.037037	0.029703	0.0243902	0.05	0.346993	0.0433742	8.80734
Normalized	1	1	1	1	1	1	1	1
										n =	8
										Consistency Index (CI)	0.155119
										Saaty Index (RI)	1.41
										Consistency Ratio (CR)	0.110014

## Sheet: 9x9
Title
Classes	C1	C2	C3	C4	C5	C6	C7	C8	C9
C1	1	7	3	2	3	2	3	4	5
C2	0.142857	1	2	3	4	5	6	5	4
C3	0.333333	0.5	1	2	2	4	2	2	3
C4	0.5	0.333333	0.5	1	2	2	3	2	8
C5	0.333333	0.25	0.5	0.5	1	2	2	2	3
C6	0.5	0.2	0.25	0.5	0.5	1	3	2	3
C7	0.333333	0.166667	0.5	0.333333	0.5	0.333333	1	2	2
C8	0.25	0.2	0.5	0.5	0.5	0.5	0.5	1	3
C9	0.2	0.25	0.333333	0.125	0.333333	0.333333	0.5	0.333333	1
ok
SUM	3.59286	9.9	8.58333	9.95833	13.8333	17.1667	21	20.3333	32
Normalized Criteria Matrix
Factor	C1	C2	C3	C4	C5	C6	C7	C8	C9	Sum	Eigen Vector (Weights)	Consistency Measure
C1	0.27833	0.707071	0.349515	0.200837	0.216867	0.116505	0.142857	0.196721	0.15625	2.36495	0.262773	12.301
C2	0.0397614	0.10101	0.23301	0.301255	0.289157	0.291262	0.285714	0.245902	0.125	1.91207	0.212452	10.3741
C3	0.0927767	0.0505051	0.116505	0.200837	0.144578	0.23301	0.0952381	0.0983607	0.09375	1.12556	0.125062	10.3488
C4	0.139165	0.03367	0.0582524	0.100418	0.144578	0.116505	0.142857	0.0983607	0.25	1.08381	0.120423	9.63516
C5	0.0927767	0.0252525	0.0582524	0.0502092	0.0722892	0.116505	0.0952381	0.0983607	0.09375	0.702634	0.0780704	9.88122
C6	0.139165	0.020202	0.0291262	0.0502092	0.0361446	0.0582524	0.142857	0.0983607	0.09375	0.668067	0.0742297	9.58891
C7	0.0927767	0.016835	0.0582524	0.0334728	0.0361446	0.0194175	0.047619	0.0983607	0.0625	0.465379	0.0517087	9.50944
C8	0.0695825	0.020202	0.0582524	0.0502092	0.0361446	0.0291262	0.0238095	0.0491803	0.09375	0.430257	0.0478063	9.68828
C9	0.055666	0.0252525	0.038835	0.0125523	0.0240964	0.0194175	0.0238095	0.0163934	0.03125	0.247273	0.0274747	10.28
Normalized	1	1	1	1	1	1	1	1	1
											n =	9
											Consistency Index (CI)	0.147317
											Saaty Index (RI)	1.46
											Consistency Ratio (CR)	0.100902

## Sheet: 10x10
Title
Classes	C1	C2	C3	C4	C5	C6	C7	C8	C9	C10
C1	1	7	3	2	3	2	3	4	5	6
C2	0.142857	1	2	3	4	5	6	5	4	3
C3	0.333333	0.5	1	2	2	4	2	2	3	4
C4	0.5	0.333333	0.5	1	2	2	3	2	3	3
C5	0.333333	0.25	0.5	0.5	1	2	2	2	3	3
C6	0.5	0.2	0.25	0.5	0.5	1	3	2	3	2
C7	0.333333	0.166667	0.5	0.333333	0.5	0.333333	1	2	2	2
C8	0.25	0.2	0.5	0.5	0.5	0.5	0.5	1	3	2
C9	0.2	0.25	0.333333	0.333333	0.333333	0.333333	0.5	0.333333	1	2
C10	0.166667	0.333333	0.25	0.333333	0.333333	0.5	0.5	0.5	0.5	1
SUM	3.75952	10.2333	8.83333	10.5	14.1667	17.6667	21.5	20.8333	27.5	28
Normalized Criteria Matrix
Factor	C1	C2	C3	C4	C5	C6	C7	C8	C9	C10	Sum	Eigen Vector (Weights)	Consistency Measure
C1	0.265991	0.684039	0.339623	0.190476	0.211765	0.113208	0.139535	0.192	0.181818	0.214286	2.53274	0.253274	13.0936
C2	0.0379987	0.0977199	0.226415	0.285714	0.282353	0.283019	0.27907	0.24	0.145455	0.107143	1.98489	0.198489	11.4734
C3	0.0886637	0.0488599	0.113208	0.190476	0.141176	0.226415	0.0930233	0.096	0.109091	0.142857	1.24977	0.124977	11.1548
C4	0.132996	0.0325733	0.0566038	0.0952381	0.141176	0.113208	0.139535	0.096	0.109091	0.107143	1.02356	0.102356	10.8983
C5	0.0886637	0.02443	0.0566038	0.047619	0.0705882	0.113208	0.0930233	0.096	0.109091	0.107143	0.806369	0.0806369	10.8081
C6	0.132996	0.019544	0.0283019	0.047619	0.0352941	0.0566038	0.139535	0.096	0.109091	0.0714286	0.736413	0.0736413	10.6331
C7	0.0886637	0.0162866	0.0566038	0.031746	0.0352941	0.0188679	0.0465116	0.096	0.0727273	0.0714286	0.53413	0.053413	10.4622
C8	0.0664978	0.019544	0.0566038	0.047619	0.0352941	0.0283019	0.0232558	0.048	0.109091	0.0714286	0.505636	0.0505636	10.4828
C9	0.0531982	0.02443	0.0377358	0.031746	0.0235294	0.0188679	0.0232558	0.016	0.0363636	0.0714286	0.336555	0.0336555	10.7764
C10	0.0443319	0.0325733	0.0283019	0.031746	0.0235294	0.0283019	0.0232558	0.024	0.0181818	0.0357143	0.289936	0.0289936	11.5628
Normalized	1	1	1	1	1	1	1	1	1	1
												n =	10
												Consistency Index (CI)	0.126061
												Saaty Index (RI)	1.49
												Consistency Ratio (CR)	0.084605

## Sheet: 11x11
Title
Classes	C1	C2	C3	C4	C5	C6	C7	C8	C9	C10	C11
C1	1	7	3	2	3	2	3	4	5	6	7
C2	0.142857	1	2	3	4	5	6	5	4	3	2
C3	0.333333	0.5	1	2	2	4	2	2	3	4	2
C4	0.5	0.333333	0.5	1	2	2	3	2	3	3	3
C5	0.333333	0.25	0.5	0.5	1	2	2	2	3	3	2
C6	0.5	0.2	0.25	0.5	0.5	1	3	2	3	2	3
C7	0.333333	0.166667	0.5	0.333333	0.5	0.333333	1	2	2	2	2
C8	0.25	0.2	0.5	0.5	0.5	0.5	0.5	1	3	2	3
C9	0.2	0.25	0.333333	0.333333	0.333333	0.333333	0.5	0.333333	1	2	3
C10	0.166667	0.333333	0.25	0.333333	0.333333	0.5	0.5	0.5	0.5	1	3
C11	0.142857	0.5	0.5	0.333333	0.5	0.333333	0.5	0.333333	0.333333	0.333333	1
SUM	3.90238	10.7333	9.33333	10.8333	14.6667	18	22	21.1667	27.8333	28.3333	31
Normalized Criteria Matrix
Factor	C1	C2	C3	C4	C5	C6	C7	C8	C9	C10	C11	Sum	Eigen Vector (Weights)	Consistency Measure
C1	0.256254	0.652174	0.321429	0.184615	0.204545	0.111111	0.136364	0.188976	0.179641	0.211765	0.225806	2.67268	0.242971	14.0511
C2	0.0366077	0.0931677	0.214286	0.276923	0.272727	0.277778	0.272727	0.23622	0.143713	0.105882	0.0645161	1.99455	0.181323	12.8441
C3	0.0854179	0.0465839	0.107143	0.184615	0.136364	0.222222	0.0909091	0.0944882	0.107784	0.141176	0.0645161	1.28122	0.116475	12.5534
C4	0.128127	0.0310559	0.0535714	0.0923077	0.136364	0.111111	0.136364	0.0944882	0.107784	0.105882	0.0967742	1.09383	0.099439	12.2073
C5	0.0854179	0.0232919	0.0535714	0.0461538	0.0681818	0.111111	0.0909091	0.0944882	0.107784	0.105882	0.0645161	0.851308	0.0773917	12.2675
C6	0.128127	0.0186335	0.0267857	0.0461538	0.0340909	0.0555556	0.136364	0.0944882	0.107784	0.0705882	0.0967742	0.815345	0.0741223	11.957
C7	0.0854179	0.015528	0.0535714	0.0307692	0.0340909	0.0185185	0.0454545	0.0944882	0.0718563	0.0705882	0.0645161	0.584799	0.0531636	11.8388
C8	0.0640635	0.0186335	0.0535714	0.0461538	0.0340909	0.0277778	0.0227273	0.0472441	0.107784	0.0705882	0.0967742	0.589409	0.0535827	11.7781
C9	0.0512508	0.0232919	0.0357143	0.0307692	0.0227273	0.0185185	0.0227273	0.015748	0.0359281	0.0705882	0.0967742	0.424038	0.0385489	11.7762
C10	0.042709	0.0310559	0.0267857	0.0307692	0.0227273	0.0277778	0.0227273	0.023622	0.0179641	0.0352941	0.0967742	0.378207	0.0343824	12.1834
C11	0.0366077	0.0465839	0.0535714	0.0307692	0.0340909	0.0185185	0.0227273	0.015748	0.011976	0.0117647	0.0322581	0.314616	0.0286014	13.1991
Normalized	1	1	1	1	1	1	1	1	1	1	1
													n =	11
													Consistency Index (CI)	0.142327
													Saaty Index (RI)	1.92
													Consistency Ratio (CR)	0.0741286

## Sheet: 12x12
Title
Classes	C1	C2	C3	C4	C5	C6	C7	C8	C9	C10	C11	C12
C1	1	7	3	2	3	2	3	4	5	6	7	2
C2	0.142857	1	2	3	4	5	6	5	4	3	2	3
C3	0.333333	0.5	1	2	2	4	2	2	3	4	2	2
C4	0.5	0.333333	0.5	1	2	2	3	2	3	3	3	2
C5	0.333333	0.25	0.5	0.5	1	2	2	2	3	3	2	3
C6	0.5	0.2	0.25	0.5	0.5	1	3	2	3	2	3	2
C7	0.333333	0.166667	0.5	0.333333	0.5	0.333333	1	2	2	2	2	2
C8	0.25	0.2	0.5	0.5	0.5	0.5	0.5	1	3	2	3	3
C9	0.2	0.25	0.333333	0.333333	0.333333	0.333333	0.5	0.333333	1	2	3	2
C10	0.166667	0.333333	0.25	0.333333	0.333333	0.5	0.5	0.5	0.5	1	3	2
C11	0.142857	0.5	0.5	0.333333	0.5	0.333333	0.5	0.333333	0.333333	0.333333	1	2
C12	0.5	0.333333	0.5	0.5	0.333333	0.5	0.5	0.333333	0.5	0.5	0.5	1
SUM	4.40238	11.0667	9.83333	11.3333	15	18.5	22.5	21.5	28.3333	28.8333	31.5	26
Normalized Criteria Matrix
Factor	C1	C2	C3	C4	C5	C6	C7	C8	C9	C10	C11	C12	Sum	Eigen Vector (Weights)	Consistency Measure
C1	0.22715	0.63253	0.305085	0.176471	0.2	0.108108	0.133333	0.186047	0.176471	0.208092	0.222222	0.0769231	2.65243	0.221036	15.4533
C2	0.03245	0.0903614	0.20339	0.264706	0.266667	0.27027	0.266667	0.232558	0.141176	0.104046	0.0634921	0.115385	2.05117	0.170931	14.1698
C3	0.0757166	0.0451807	0.101695	0.176471	0.133333	0.216216	0.0888889	0.0930233	0.105882	0.138728	0.0634921	0.0769231	1.31555	0.109629	13.8967
C4	0.113575	0.0301205	0.0508475	0.0882353	0.133333	0.108108	0.133333	0.0930233	0.105882	0.104046	0.0952381	0.0769231	1.13267	0.0943888	13.6352
C5	0.0757166	0.0225904	0.0508475	0.0441176	0.0666667	0.108108	0.0888889	0.0930233	0.105882	0.104046	0.0634921	0.115385	0.938764	0.0782304	13.5516
C6	0.113575	0.0180723	0.0254237	0.0441176	0.0333333	0.0540541	0.133333	0.0930233	0.105882	0.0693642	0.0952381	0.0769231	0.86234	0.0718617	13.4087
C7	0.0757166	0.0150602	0.0508475	0.0294118	0.0333333	0.018018	0.0444444	0.0930233	0.0705882	0.0693642	0.0634921	0.0769231	0.640223	0.0533519	13.2331
C8	0.0567875	0.0180723	0.0508475	0.0441176	0.0333333	0.027027	0.0222222	0.0465116	0.105882	0.0693642	0.0952381	0.115385	0.684788	0.0570657	13.0363
C9	0.04543	0.0225904	0.0338983	0.0294118	0.0222222	0.018018	0.0222222	0.0155039	0.0352941	0.0693642	0.0952381	0.0769231	0.486116	0.0405097	13.0526
C10	0.0378583	0.0301205	0.0254237	0.0294118	0.0222222	0.027027	0.0222222	0.0232558	0.0176471	0.0346821	0.0952381	0.0769231	0.442032	0.036836	13.3265
C11	0.03245	0.0451807	0.0508475	0.0294118	0.0333333	0.018018	0.0222222	0.0155039	0.0117647	0.0115607	0.031746	0.0769231	0.378962	0.0315802	13.8887
C12	0.113575	0.0301205	0.0508475	0.0441176	0.0222222	0.027027	0.0222222	0.0155039	0.0176471	0.017341	0.015873	0.0384615	0.414958	0.0345799	13.4833
Normalized	1	1	1	1	1	1	1	1	1	1	1	1
														n =	12
														Consistency Index (CI)	0.152543
														Saaty Index (RI)	2.1
														Consistency Ratio (CR)	0.0726395

[truncated: 1 more sheets: Reference]
