# Supplementary material
Source: Elsevier journal article supplement (https://www.sciencedirect.com/science/article/pii/S2530064422000748)
Supplement: mmc4 [file S2530064422000748:mmc4.docx]

Abordagem participativa para mapear áreas estratégicas para conservação e restauração em escala regional

Luara Tourinhoa,*,1, Sara Maria de Brito Alvesb, Felipe Bastos Lobo da Silvac, Marcio Verdid,e, Nádia Roquef, Abel Augusto Conceiçãog, Lidyanne Y.S. Aonah, Guilherme de Oliveirai, Alessandra Nasser Caiafai, Dary M. G. Rigueirab, Tiago Jordão Portoc, Ricardo Dobrovolskif, Bruno Vilelaf

a Programa de Pós-Graduação em Ecologia, Universidade Federal do Rio de Janeiro, Ilha do Fundão, 21941-970, Rio de Janeiro, Brazil.

b Instituto do Meio Ambiente e Recursos Hídricos da Bahia - INEMA, Governo da Bahia. Avenida Luís Viana Filho, 6ª Avenida, nº 600, CAB, CEP 41.745-900, Salvador, Bahia.

c Secretaria do Meio Ambiente, Governo da Bahia. Avenida Luís Viana Filho, 6ª Avenida, nº 600, CAB, CEP 41.745-900, Salvador, Bahia.

d Centro Nacional de Conservação da Flora, Instituto de Pesquisa Jardim Botânico do Rio de Janeiro, Rua Pacheco Leão, 915, Jardim Botânico, 22460-030, Rio de Janeiro, Brazil.

e IUCN SSC Brazil Plant Red List Authority, Rua Pacheco Leão, 915, Jardim Botânico, 22460-030, Rio de Janeiro, Brazil.

f Universidade Federal da Bahia, Rua Barão de Jeremoabo s/n, Campus Universitário, Ondina, 40171–970, Salvador, Bahia, Brazil.

g Universidade Estadual de Feira de Santana, Av. Transnordestina s/n, 44036-900, Feira de Santana, Bahia, Brazil.

h Herbário do Recôncavo da Bahia. Universidade Federal do Recôncavo da Bahia, Centro de Ciências Agrárias, Ambientais e Biológicas, Rui Barbosa, 710, Centro. Cruz das Almas, Bahia, Brazil.

i Universidade Federal do Recôncavo da Bahia, Centro de Ciências Agrárias, Ambientais e biológicas, Rua Rui Barbosa, 710, Centro, Cruz das Almas, Bahia, Brazil.

*Autora correspondente. E-mail: [loptourinho@gmail.com](mailto:loptourinho@gmail.com); Phone: +55 71 988055121

1Endereço atual: Instituto de Estudos Avançados, Universidade de São Paulo, R. do Anfiteatro, 513, Butantã, São Paulo, 05508-060, SP, Brazil.

Resumo

A identificação e o mapeamento de áreas estratégicas para ações de conservação e restauração são essenciais para reduzir os impactos humanos sobre a biodiversidade. No entanto, a maioria das priorizações espaciais não envolve tomadores de decisão e partes interessadas, gerando uma distância entre ciência e aplicação. Aqui descrevemos um passo a passo de uma abordagem participativa para identificar e mapear áreas estratégicas para conservação de espécies e seus ecossistemas (SASC), bem como identificar áreas importantes para restauração (SAER) em uma região altamente biodiversa da Bahia, Brasil. Tivemos 11 reuniões, nas quais cientistas, tomadores de decisão e partes interessadas discutiram e concordaram com o projeto e a metodologia. Os participantes escolheram cinco critérios de priorização: quantidade de habitat, adequabilidade ambiental, frequência de incêndios, quantidade de áreas de preservação permanente e diversidade de fitofisionomias, nesta ordem. Primeiro foi gerado um mapa técnico com base nesses critérios, que foi ajustado em 11 SASC e 12 SAER, de acordo com as perspectivas dos participantes. Muitas decisões tomadas durante esse processo dificilmente seriam tomadas em um processo convencional de priorização acadêmica, pois algumas demandas surgiram dos participantes. As áreas estratégicas mapeadas neste estudo serão o ponto de partida para muitas ações de conservação posteriores (e.g. redução de impactos agrícolas e comércio de espécies). Portanto, os resultados foram produzidos de modo a facilitar seu entendimento ao público em geral. Esse processo proporcionou aos participantes um sentimento de apropriação do conhecimento, pois se tornaram agentes ativos no processo.

Palavras-chave

Planejamento sistemático. Priorização espacial. Processo de tomada de decisão. Partes interessadas. Gestores ambientais. Lacuna ciência e prática.

Introdução

Diversas são as atividades humanas que ameaçam a biodiversidade e a integridade dos ecossistemas (Díaz et al., 2019). A intensidade e a importância de cada ameaça podem variar localmente, a depender da composição da biodiversidade e dos fatores socioeconômicos e políticos da região avaliada (Loyola et al., 2018; Pimm et al., 2014; Strassburg et al., 2019). Nesse sentido, para conservar a biodiversidade e obter os benefícios decorrentes dos processos ecossistêmicos, é fundamental identificar e mapear áreas estratégicas para a implementação de ações de conservação, restauração e gestão (Akçakaya et al., 2018; Pimm et al., 2014; Strassburg et al., 2019).

O mapeamento de áreas estratégicas é um dos primeiros passos dos planos de ação e gestão governamentais (e.g. ConsórcioGeoBahia et al., 2018; INEMA et al., 2020; Rocha et al., 2019). Tais iniciativas costumam ter prazos curtos para elaboração e implementação, objetivos múltiplos e os recursos alocados tendem a ser muito limitados, principalmente em países em desenvolvimento e de baixa renda (Godoy e Leuzinger, 2015). Nesse sentido, é importante que o mapeamento dessas áreas adote: (i) uma metodologia de baixo custo, eficiente e rápida; (ii) objetivos bem definidos; e (iii) uma abordagem participativa, adaptável à realidade local. Embora existam muitos estudos de priorização com grande contribuição técnica (e.g. Dória and Dobrovolski, 2021; Niemeyer et al., 2020), o não envolvimento de tomadores de decisão e partes interessadas nesses processos cria uma lacuna entre a aplicação e a ciência, impossibilitando contribuições acadêmicas à subsidiar estratégias governamentais (Bertuol-Garcia et al., 2018). O processo participativo durante o mapeamento é essencial, pois é nesta etapa que cientistas, tomadores de decisão e partes interessadas discutem as principais ameaças às espécies, os conflitos regionais e o custo de cada etapa, aumentando as chances de uma solução proposta ser efetivamente adotada pelo governo e aceito pela comunidade local (Loyola et al., 2018; Pougy et al., 2015; Strassburg et al., 2019).

A região da Chapada Diamantina e Serra da Jiboia (Bahia, Brasil) é uma área muito importante para conservação, pois esta região possui alta biodiversidade, que fornece uma série de serviços ecossistêmicos à comunidade humana local (e.g. estoque de carbono, segurança hídrica devido à mata ciliar e por ser uma das regiões de maior interesse turístico do país) (Blengini et al., 2015; Fernandes et al., 2020; Giulietti et al., 1997; INEMA et al., 2020). No entanto, essas regiões são altamente impactadas por atividades humanas como turismo, mineração, urbanização, queimadas de vegetação nativa, monoculturas, pecuária, extração e coleta de flora e fauna para cultivo e exportação (Blengini et al., 2015; INEMA et al., 2020; Martinelli, 2007). Entendendo que estas regiões carecem de ações de conservação e restauração urgentes, o Plano de Ação Territorial para a Conservação de Espécies Ameaçadas do Território Chapada Diamantina-Serra da Jiboia – PAT-CDSJ foi concebido para minimizar as pressões das atividades humanas sobre a biodiversidade e ecossistema desta região (INEMA et al., 2020). Dois dos principais alvos de conservação deste plano de ação são (i) as espécies Criticamente em Perigo de extinção (CR), que não ocorrem em nenhuma área de proteção ambiental e não eram contempladas por planos de ação (chamadas de CR-Lacunas) e (ii) seus ecossistemas.

Neste estudo, fornecemos uma estrutura de priorização bem-sucedida aplicada ao PAT-CDSJ, com base em uma abordagem participativa. Identificamos e mapeamos áreas estratégicas para a conservação de espécies CR-Lacunas e seus ecossistemas (SASC) e áreas estratégicas para restauração de ecossistemas (SAER). A estrutura de mapeamento proposta foi inteiramente elaborada por cientistas, tomadores de decisão e partes interessadas. Essa estrutura inclui uma metodologia de baixo custo, rápido desenvolvimento e, que pode ser aplicada a diferentes regiões quando ajustada aos objetivos e contextos locais.

Métodos

PAT-CDSJ, área de estudo e espécies alvo

O PAT-CDSJ é um plano de ação construído pelo governo da Bahia em um processo participativo, incluindo tomadores de decisão, cientistas e partes interessadas (INEMA et al., 2020). Este documento é um instrumento que ajuda a orientar as políticas públicas e colocá-las em prática. O PAT-CDSJ apresenta um conjunto de objetivos e ações propostas que irão solucionar problemas e minimizar ameaças às espécies e seus ecossistemas (ver detalhes do documento e ações do PAT-CDSJ no Material Suplementar 1). A seleção de áreas estratégicas para conservação e restauração foi originalmente solicitada por tomadores de decisão – membros do governo regional (Bahia) e responsáveis pelas ações do PAT-CDSJ. Assim, este estudo faz parte da primeira ação do PAT-CDSJ e subsidiará suas ações posteriores.

A área de estudo considera os limites definidos para o PAT-CDSJ, estendendo-se entre as regiões central e leste do estado da Bahia, Brasil (Fig. 1). Os limites abrangem porções de 56 municípios e cobrem 3.918.743 há (INEMA et al., 2020). O objetivo do PAT-CDSJ é desenvolver políticas públicas em áreas desprotegidas, uma vez que as áreas protegidas já estão asseguradas pela lei. A Chapada Diamantina ocorre principalmente no domínio brasileiro da Caatinga (i.e. vegetação semiárida), enquanto a Serra da Jiboia está dentro do domínio brasileiro da Mata Atlântica. Esta região é composta por uma grande variedade de condições climáticas, formações geológicas (com cadeias de montanhas) e tipos de solo e vegetação (Fig. 1 and S1), alta diversidade e grau de endemismo (Giulietti et al., 1997; INEMA et al., 2020). A maioria das 27 espécies CR-Lacunas (24 plantas e três invertebrados, Tabela S1) do PAT-DCSJ são endêmicas das regiões montanhosas da Bahia, Brasil, de baixa densidade populacional (INEMA et al., 2020; IUCN, 2022).

Processo participativo

Todas as etapas deste estudo foram fundamentadas e acordadas a partir de uma série de reuniões e oficinas participativas de construção e monitoramento, com a participação de cientistas (de universidades estaduais e federais), tomadores de decisão (administradores do governo regional) e partes interessadas (i.e. outros representantes do governo, gestores de unidades de conservação, e organizações não-governamentais) (Figura 2, Tabela S2). Na primeira etapa deste processo, os tomadores de decisão apresentaram o projeto PAT-CDSJ (INEMA et al., 2020) e as expectativas sobre o produto final (as Áreas Estratégicas para Conservação de Espécies - SASC e Áreas Estratégicas para a Restauração de Ecossistemas - SAER). Em seguida, na primeira oficina participativa, a cientista responsável pelo mapeamento sugeriu um plano de trabalho. Utilizando o plano de trabalho como ponto de partida, os participantes definiram de forma consensual a metodologia e os dados que deveriam ser utilizados, considerando o contexto local, disponibilidade de dados, principais ameaças às espécies, viabilidade do projeto e a relevância e o custo de cada critério de mapeamento (veja detalhes abaixo). Após a definição dos critérios, os participantes atribuíram pesos a cada um dos critérios.

A intenção do plano de trabalho era ser inclusivo, considerando vários aspectos ambientais e socioeconômicos possíveis, para que os participantes pudessem discutir e decidir os melhores aspectos e estratégias. Dentre todos os possíveis aspectos favoráveis ​​e desfavoráveis ​​ao mapeamento, o objetivo do plano de trabalho era atingir um número reduzido de critérios para a seleção das áreas. Por exemplo, em relação às unidades de planejamento, os participantes discutiram se deveriam considerar a unidade de planejamento como um polígono regular (e.g. hexágonos) ou microbacias, e qual nível de microbacia seria adotado. Em relação aos critérios, os participantes discutiram várias possibilidades de métricas de paisagem (e.g. quantidade de habitat, conectividade, distância entre fragmentos), pressões humanas (e.g. proximidade de áreas de mineração, frequência de incêndios, tipo e proximidade das áreas agrícolas) e proximidade de áreas de preservação permanente (APP). Todos os participantes tiveram que justificar o porquê de cada decisão e escolha metodológica.

A cientista responsável pelo mapeamento reuniu todos os dados para a produção do mapeamento – parte compilados por bancos de dados online (e.g. registros de ocorrências e variáveis ambientais), parte fornecidos pelos membros do governo regional (e.g. limites do PAT-CDSJ e APP), e parte fornecidos por os outros cientistas (e.g. registros de ocorrência e classificação fitofisionômica). A cientista responsável desenvolveu todos os procedimentos técnicos de mapeamento, porém, a maioria das etapas foi auxiliada por outros(as) cientistas e tomadores de decisão em breves reuniões. Por exemplo: (i) a cientista responsável compilou registros de ocorrências de bancos de dados e os(as) taxonomistas os validaram, e (ii) a cientista responsável propôs um projeto de APP e um técnico de geografia do INEMA validou a proposta e forneceu dados adicionais (veja todos os detalhes no subseções abaixo).

O mapeamento preliminar foi apresentado em uma segunda oficina participativa, onde os participantes deram sugestões para o mapeamento final. Os mapeamentos das SASC e SAER também foram apresentados e discutidos em duas oficinas de monitoramento do projeto geral do PAT-CDSJ, onde também foi apresentado o andamento das demais ações por outros responsáveis. Por fim, a nova proposta de mapeamento foi apresentada aos tomadores de decisão e, em seguida, enviada a todos os participantes para sugestões e aprovação final.

*Critérios do mapeamento*

Consideramos quatro e cinco critérios para definir as áreas de conservação e restauração, respectivamente (ver detalhes no Material Suplementar 1). Nesta ordem, os critérios mais relevantes foram: ‘Quantidade de habitat’, ‘Adequabilidade ambiental’, ‘Foco de incêndio’, ‘Quantidade de área de proteção permanente’ (este foi usado apenas para SAER) e ‘Diversidade de fitofisionomia’. Como unidades de planejamento (UPs) utilizadas para avaliar cada critério, escolhemos os limites da microbacia estabelecidos pela Divisão Hidrográfica Nacional, nível 6 (ANA, 2015), dividindo o PAT-CDSJ em 314 UPs – limites frequentemente utilizados em outras políticas públicas já estabelecidas e pode ser uma barreira ecológica natural para algumas espécies ou populações de animais e plantas (e.g. Loyola et al., 2018; Monteiro et al., 2018).

*Quantidade de habitat.* Utilizamos os dados do Projeto MapBiomas, coleção 5.0, resolução 250 m (Mapbiomas, 2019) para quantificar a quantidade de habitat de cada UP (i.e. porcentagem de cobertura de vegetação nativa). Reclassificamos o dado para que todos os pixels referentes à vegetação nativa fossem iguais a um e às áreas antropizadas fossem iguais a zero (Fig. S2). Para o mapeamento das SASC, consideramos mais relevantes as UPs com maior quantidade de habitat. Para o mapeamento das SAER, definimos a relevância das UPs a partir de intervalos de porcentagem de cobertura vegetal, baseados na hipótese de limiar de extinção (Andrén, 1994), onde as UPs com valores intermediários de quantidade de habitat seriam mais relevantes do que com valores extremos (i.e. os valores mais relevantes variam de 20% a 40%, enquanto os menos relevantes foram 0% e 100%, veja mais detalhes no Material Complementar 1). Para incorporar a conectividade da paisagem nos mapeamentos (importante para a manutenção dos fluxos biológicos; Pascual-Hortal e Saura, 2007), calculamos a quantidade de habitat das UPs vizinhas ao redor da UP alvo e usamos sua média como um peso para a UP alvo (Fig. S3, Material Suplementar 1).

*Adequabilidade ambiental.* Compilamos os registros de ocorrência das espécies dos bancos de dados *on-line* e refinamos os registros removendo duplicadas, viés espacial (i.e. coordenadas a menos de 1 km de distância entre si) e discrepâncias (e.g. coordenadas no mar). Utilizamos como preditores as variáveis bioclimáticas (referentes à média entre 1979 a 2013; Karger et al., 2017), de altitude (Fick and Hijmans, 2017) e de qualidade de solo (Fischer et al., 2008), resolução 30 arcsec (Tabela S3). Para espécies com mais de 20 registros de ocorrência, geramos um modelo consenso baseado nas previsões dos métodos: Bioclim, Maximum Entropy, Generalized Linear Model, Random Forest e Support Vector Machine. Para as espécies raras e com poucos registros de ocorrência, utilizamos o método Distância Euclidiana (DE) (Siqueira et al., 2009; Vilela et al., 2018), que estima a similaridade ambiental.

*Focos de incêndio.* Compilamos os registros de incêndio do Programa Queimadas (INPE e LASA, 2020), de 2017 a 2020, e contamos os registros dentro de cada UP (Fig. S4). Normalizamos os resultados entre 0 e 1, em que as UPs com maior quantidade de registros de incêndio (mais próximos de 0) foram consideradas menos relevantes para o mapeamento de SASC e SAER. A frequência de incêndios na região do PAT-CDSJ é preocupante e identificada por documentos do governo local como uma das principais ameaças à biodiversidade local (Blengini et al., 2015; INEMA et al., 2020). Os participantes (especialmente aqueles relacionados às ONGs locais, membros do governo regional e gestores ambientais) também destacaram a alta frequência de eventos de incêndio na região, principalmente devido à agricultura intensiva. Eles sugeriram que a frequência de incêndios poderia ser um proxy de alta atividade humana. Portanto, quanto maior a concentração de frequência de incêndios em uma UP, maior o custo de implantação de ações de conservação e restauração.

*Diversidade de fitofisionomia.* É esperado que ambientes com maior heterogeneidade de habitat apresentem maior diversidade de espécies, possuindo maior resiliência e capacidade de lidar com os impactos ambientais (Fahrig et al., 2021; Machado et al., 2013; Primack and Rodrigues, 2001). A heterogeneidade do habitat pode ser traduzida em diversidade de fitofisionomia, em que diferentes fitofisionomias apresentam diferentes espécies (Machado et al., 2013). Estimamos a diversidade de fitofisionomia para cada UP por meio do Índice de Diversidade de Shannon, em que quanto maior a diversidade fitofisionômica de uma UP, maior sua relevância. Utilizamos o mapeamento de classificação de fitofisionomias elaborado pela SEMA-BA e INEMA-BA (ConsórcioGeoBahia et al., 2018) (Fig. S1), considerando apenas as formações de vegetação naturais. Como a região limitada pelo PAT-CDSJ é constituída pelos domínios da Mata Atlântica e Caatinga e, nos seus limites, a Caatinga possui naturalmente maior diversidade, normalizamos os resultados separadamente para os dois domínios (Fig. S5), evitando um viés na seleção das UP localizadas na Caatinga em detrimento das UP localizadas na Mata Atlântica.

*Áreas de Preservação Permanente (APP)*. As APP podem ser definidas como: “área protegida, coberta ou não por vegetação nativa, com a função ambiental de preservar os recursos hídricos, a paisagem, a estabilidade geológica e a biodiversidade, facilitar o fluxo gênico de fauna e flora, proteger o solo e assegurar o bem-estar das populações humanas” (Brasil, 2012). A porcentagem de APP por UP foi considerada como um critério apenas para o mapeamento das SAER, uma vez que nas APP deve ter menor conflito de interesses com a comunidade local (menor custo), pois são áreas que devem apresentar vegetação nativa por lei. Os únicos dados disponíveis para as APP da região são: (i) declividade (dados não disponíveis ao público; INEMA-BA) e (ii) áreas declaradas pelos proprietários (Cadastro Florestal Estadual de Imóveis Rurais; GeoBahia, 2021a). No entanto, nem todos os proprietários declararam suas APP e a maioria refere-se apenas às regiões de vegetação ciliar (para definições de limites de APP ver Brasil, 2012). Para complementar os dados disponíveis, adicionamos a menor distância sugerida pela legislação (i.e. 30 m) ao longo dos rios (GeoBahia, 2021b). Juntamos este resultado aos dados disponíveis para melhor aproximar o valor real de APP (Fig. S6) e calculamos a porcentagem da área de APP composta para cada UP.

*Atribuição de pesos e avaliação de multicritérios*

Os critérios apresentados acima não necessariamente possuem a mesma relevância no mapeamento das SASC e SAER. Para lidar com a relevância, utilizamos o método *Analytic Hierarchy Process* (AHP) (Saaty, 1977) – comumente adotado em planos de ação governamental no Brasil (e.g. ConsórcioGeoBahia et al., 2018; Rocha et al., 2019). Este método possibilita a comparação entre pares de critérios, de acordo com a escala fundamental de Saaty (1977), em que quando um critério possui igual relevância em relação ao seu par, recebe o valor 1 e, quando é muito mais relevante em relação ao seu par, recebe o valor 9 (Tabela S4).

A fim de alcançar o consenso entre os participantes durante a oficina, a AHP foi aplicada juntamente com o método das comparações sucessivas entre os pares de critérios por jogo de cartas em painel (Fig. S7). Na primeira etapa deste processo, discutimos os critérios relevantes para ambos os mapeamentos (SASC e SAER), separadamente. Cada critério foi exposto em um painel e os participantes entraram em consenso sobre a ordem de relevância dos critérios, justificando sua escolha com bases teóricas e práticas. Atribuímos, então, pesos para cada critério e, para estimar a consistência entre os pesos escolhidos. Para estimar a consistência entre os pesos, calculamos o Índice de Consistência (ver detalhes no Material Suplementar 2), onde valores próximos de 1 indicam baixa consistência e próximos de 0 indicam alta consistência (Saaty, 1980). Em seguida, consideramos índices abaixo de 0,1 como consistentes para validar os pesos atribuídos. A próxima etapa foi multiplicar o resultado padronizado (i.e. normalizado de 0 a 1) de cada um dos critérios pelo seu peso. Todos os critérios ponderados foram somados de forma a gerar um resultado único para cada uma das espécies alvo do PAT, de acordo com a equação:

em que *R* se refere ao resultado final *f*, baseado nos resultados de cada critério *i*. O parâmetro ω se refere ao peso atribuído ao respectivo critério. O resultado final também foi normalizado de 0 a 1 para cada espécie, variando entre 0 (relevante) e 1 (altamente relevante).

Definimos a seguinte ordem de relevância dos critérios do mapeamento das SASC (exceto o item 4) e SAER: 1) Quantidade de habitat, 2) Adequabilidade ambiental, 3) Focos de incêndio, 4) Quantidade de Áreas de Proteção Permanente, 5) Diversidade de fitofisionomia. Elencamos o critério 1 como o mais relevante por estar diretamente relacionado à presença de habitat, requisito determinante para a ocorrência das espécies. O critério 2 veio em sequência, pois o mapeamento tem como objetivo principal a conservação das espécies CR-Lacunas e seus ecossistemas, logo, as regiões mais adequadas ambientalmente para as espécies devem ser priorizadas. Como a região do PAT-CDSJ tem um histórico recorrente de incêndios, este critério ficou como o terceiro mais importante. Para restauração, o critério das APP foi eleito como o quarto mais importante, considerando a importância da manutenção dos recursos hídricos e o incentivo ao cumprimento da legislação. Por fim, o critério 5 foi o menos relevante, pois a heterogeneidade de uma UP é importante para a manutenção da dinâmica das comunidades locais, mas não é determinante para a ocorrência e persistência das espécies. Uma vez elencada a ordem de prioridade, cada critério recebeu um peso atrelado à sua relevância.

*Áreas estratégicas*

A partir do resultado final (i.e. ) de cada uma das 27 espécies, geramos um mapa síntese com o somatório dos resultados, em que quanto mais alto o valor da UP, mais relevante ela é. Selecionamos do mapa síntese apenas 30% das UP mais relevantes. Segundo os tomadores de decisão, este é um percentual viável para a implementação de políticas públicas subsequentes, considerando o orçamento disponível para o PAT-CDSJ.

Para selecionar as UP mais relevantes, primeiro consideramos todas as UP com registros de ocorrência de espécies CR-Lacunas, para garantir que todos os locais onde as espécies foram encontradas fossem considerados, ajudando a reduzir as espécies lacunas nas atuais áreas protegidas no Brasil (Rodrigues et al., 2004). Em seguida, selecionamos as UP restantes de maior valor de relevância de acordo com os critérios (i.e. as que já não possuíam registros de ocorrência). Essa seleção foi proporcional para a vegetação nos domínios da Caatinga e Mata Atlântica, onde ocorrem a Chapada Diamantina e Serra da Jiboia, respectivamente. Distinguimos as áreas estratégicas a partir de um conjunto de UP próximas umas das outras e dentro das unidades políticas (i.e. municípios). Os participantes delimitaram e nomearam as áreas estratégicas de acordo com seu conhecimento sobre as características socioambientais da região (veja detalhes dos procedimentos de delimitação e nomeação de áreas estratégicas no Material Suplementar 1).

Resultados

Áreas estratégicas

Tanto para os mapas de conservação quanto para de restauração, os critérios apresentaram um padrão disperso pelo território, com exceção do critério quantidade de habitat no mapa de conservação, que apresentou maior relevância principalmente no entorno das áreas protegidas (Fig. 3). O mapa síntese para conservação apresentou o mesmo padrão do critério quantidade de habitat – pois este critério recebeu o maior peso em relação aos demais – enquanto para restauração, apresentou um padrão mais disperso (Fig. 3). Ao restringir o resultado aos 30% de UP mais relevantes, selecionamos 86 UP na Chapada Diamantina (em que 32 UP tiveram registros de ocorrência de espécies, Fig. S8) e 8 UP na Serra da Jiboia (em que 1 UP teve ocorrência de espécies registros, Fig. S8). Por fim, a delimitação de áreas estratégicas gerou 11 SASC, mais concentrados em torno das áreas protegidas (Fig. 4A, Tabela S5), e 12 SAER, mais bem distribuídos no PAT-DCSJ (Fig. 4B, Tabela S6).

Processo participativo

Aproximadamente 29 participantes participaram das duas oficinas participativas e das duas oficinas de monitoramento, enquanto as reuniões assistenciais (aproximadamente sete) tiveram menos participantes, com os tomadores de decisão sempre presentes. As quatro oficinas tiveram duração aproximada de 4 horas e as reuniões de auxílio à cientista responsável (i.e. *assistance meetings*, Fig. 2) foram mais curtas (~2 horas). O grupo de participantes era heterogêneo, consequentemente, durante os encontros, algumas sugestões divergentes foram expostas, porém, sempre chegávamos a um consenso antes de passar para a próxima etapa.

Em geral, enquanto os cientistas se concentravam nos métodos ideais e nos aspectos biológicos (já que a maioria dos cientistas eram biólogos), os tomadores de decisão e as partes interessadas se concentravam na utilidade e viabilidade da implementação do mapa e nos aspectos políticos. Por exemplo, considerando que o principal alvo de conservação são as espécies CR-Lacunas, inicialmente, os cientistas sugeriram o uso de bacias como unidades de planejamento devido aos limites naturais, o que é mais relevante para os aspectos biológicos. Alguns tomadores de decisão, no entanto, sugeriram unidades políticas (i.e limites de município) devido à facilidade de realização de ações de políticas públicas nessas unidades. Considerando ambos os aspectos, foi decidido usar os limites da bacia para as unidades menores (i.e. UP) e agregar essas unidades considerando os limites políticos em áreas estratégicas.

Outro exemplo foi relacionado à apresentação das áreas estratégicas. Alguns cientistas sugeriram apresentar todas as UP com cores graduais, das áreas mais para as menos relevantes. Eles argumentaram que, mesmo dentro das áreas estratégicas, a coloração gradual traz a ideia de uma ordenação de prioridades que poderia orientar a ordem de execução das ações do PAT-CDSJ. No entanto, os tomadores de decisão defenderam a delimitação das áreas sem a gradação. Os motivos foram: (i) um mapa gradual não é informativo, pois eles já sabem que toda a região é importante – ao invés de decidir depois quais são as melhores áreas para implementar novas ações, eles queriam delimitá-las exatamente nesta ação, (ii) um resultado delimitado é mais intuitivo para apresentar a outros stakeholders e tomadores de decisão, evitando a interpretação errônea de que “algumas dessas áreas selecionadas não são tão importantes”, e (iii) o início das próximas ações será quase simultâneo em todas as áreas definidas, e a ordem de execução das ações dependerá especialmente da articulação com os tomadores de decisão locais. A solução foi manter ambos os resultados, os mapas de gradientes como suplemento e os delimitados SASC e SAER como desenho final do mapeamento.

Outras discussões importantes ocorreram independentemente do grupo ao qual os participantes pertenciam. Por exemplo, eles avaliaram que a maioria dos critérios relacionados às pressões humanas (e.g. mineração, agricultura, pecuária e áreas urbanas) coincidiam com as áreas relatadas pelos critérios 'Quantidade de habitat' e 'Frequência de incêndio'. Portanto, foi decidido não incluir essas pressões humanas para evitar redundância e critérios altamente correlacionados.

Em relação à frequência de incêndios, alguns participantes alertaram para o alto custo de se considerar UP com alta frequência de incêndios para conservação e restauração, pois: (i) para conservação, essas UP não seriam prioritárias devido ao alto nível de degradação, e (ii) para restauração, pois há necessidade de esforços de restauração de alto custo e a suscetibilidade dessas áreas à degradação recorrente é proeminente. Por outro lado, outros participantes alertaram para a necessidade urgente de conservar e restaurar as áreas mais ameaçadas com maior frequência de incêndios. Decidiram priorizar a baixa frequência de incêndios para áreas estratégicas, com base nos itens (i), (ii) e (iii) porque o controle de incêndio é uma das ações propostas do PAT-CDSJ, mas não a principal, e os recursos são limitados a cada ação do PAT-CDSJ (ver Material Suplementar 1).

De acordo com os resultados preliminares dos mapas síntese (i.e. todos os critérios juntos), a Serra da Jiboia apresentou menor prioridade que a Chapada Diamantina. Os participantes argumentaram que esse resultado implicava em uma possível não priorização da região da Serra da Jiboia, contrariando o objetivo do PAT-CDSJ. Assim, foi sugerido separar a Chapada Diamantina e a Serra da Jiboia nas análises e priorizar proporcionalmente ambas as regiões (conforme descrito nos Métodos).

Discussão

O processo de priorização de áreas estratégicas aqui proposto foi acompanhado integralmente por uma equipe com participantes de diferentes áreas e pontos de vista. Durante o processo, algumas demandas e sugestões diferentes da proposta inicial (sugeridas por cientista) surgiram de tomadores de decisão, stakeholders e outros cientistas. As novas sugestões implicaram mudanças na metodologia para adequar o mapeamento à realidade local e às próximas políticas públicas relacionadas ao PAT-CDSJ. Este estudo, além de apresentar as áreas estratégicas (produto final), apresenta todo o processo utilizado para o desenvolvimento do mapeamento. Embora nosso estudo não tenha comparado diretamente nosso processo participativo com os processos convencionais de priorização acadêmica, algumas decisões tomadas durante esse processo dificilmente seriam tomadas em um processo convencional, devido à alta flexibilidade de uma abordagem participativa.

Primeiramente, discutindo o padrão dos mapas, era esperado que as áreas no entorno das áreas protegidas apresentassem a maior relevância, tanto no mapa síntese (i.e. todos os critérios juntos, considerando todas as UP em um gradiente de relevância), quanto no mapa das áreas estratégicas para conservação (i.e. SASC), já que as áreas protegidas tendem a favorecer a manutenção das localidades adjacentes (Gonçalves-Souza et al., 2021). O mapeamento da restauração, ao contrário, teve UP e SAER relevantes mais bem distribuídas pelo PAT-CDSJ, padrão que pode ser justificado pela forte pressão antrópica que ocorre em todo o território (INEMA et al., 2020), aqui representada pela alta frequência de incêndios e valores intermediários de quantidade de habitat na maioria das UP.

Além dos mapas de síntese e das áreas estratégicas, os mapas de critérios também são relevantes para orientar a implementação das ações planejadas a posteriori. Por exemplo, para a ação relacionada ao controle de incêndios, as áreas selecionadas aqui com alta prioridade podem não ser interessantes para um ótimo manejo de incêndios, pois provavelmente terão baixa frequência de incêndios. Áreas com alta prioridade e frequência de incêndios (de intermediária à alta), no entanto, podem ser encontradas com o auxílio do mapa de frequência de incêndios, onde o gerenciamento de incêndios ou o estabelecimento de brigadas de incêndio seriam mais relevantes. Além disso, ao identificar áreas de alta frequência de incêndios, este mapa também pode auxiliar à elaboração de novas políticas públicas voltadas para essas regiões, como ações complementares e baseadas nas experiências e práticas do PAT-CDSJ. Um segundo exemplo pode estar relacionado à reintrodução da espécie CR-Gap, outra possível ação do PAT-CDSJ. A adequação ambiental e os critérios de quantidade e qualidade do habitat são geralmente indicados como altamente relevantes para ações de reintrodução (Fiedler e Laven, 1996; Miranda et al., 2019). O mapa final (Fig. 4) identificou áreas com maior prioridade para espécies e para ecossistemas em geral. Os mapas desses critérios (principalmente a adequação ambiental, que é espécie-específica) podem ser utilizados em conjunto com o mapa final para a seleção de áreas de reintrodução, considerando espécie por espécie.

O instrumento PAT-CDSJ possui diversas ações que serão implementadas com base em nossos mapas, como reduzir os impactos das atividades agrícolas e mineração, incêndios, comércio de espécies e evitar a expansão de espécies invasoras (INEMA et al., 2020). Para viabilizar a implementação dessas diferentes ações, esse mapeamento foi baseado em duas escalas de ação: unidades de planejamento com significado biológico (i.e. microbacias, UP) e unidades políticas (i.e. municípios). Os limites políticos podem não ser eficientes para ações diretamente relacionadas às espécies, pois as populações das espécies são determinadas por limites naturais, como rios e montanhas. Nesse sentido, ações relacionadas ao manejo de espécies invasoras e aos impactos da agricultura no habitat da espécie podem ser mais efetivas se implementadas na escala das UP. No entanto, várias ações para minimizar os impactos antrópicos precisam necessariamente da colaboração dos governos locais e dos cidadãos, para os quais a delimitação de limites políticos é essencial. Assim, ações relacionadas à promoção do turismo sustentável e ao combate ao comércio de espécies podem ser mais efetivas se implementadas na escala das SASC. Além disso, os mapas aqui elaborados indicam áreas de alta prioridade em escala regional, porém, muitas decisões posteriores devem ser tomadas em escala mais refinada. A restauração, por exemplo, deve considerar a expansão da conectividade entre os fragmentos (i.e. escala da paisagem) para manter as dinâmicas de metacomunidade (Arroyo-Rodríguez et al., 2020; Chase et al., 2020).

Os resultados deste estudo serão utilizados não apenas pelos tomadores de decisão diretamente envolvidos no projeto PAT-CDSJ, mas também pelos proprietários e gestores locais. Por isso, preparamos nosso mapa para ser compreensível a qualquer público. Embora tenhamos selecionado apenas algumas áreas estratégicas devido ao pouco tempo e recursos, todas as regiões do PAT-CDSJ são importantes para conservação e restauração, considerando suas características e ameaças socioambientais (Giulietti et al., 1997; INEMA et al., 2020). Assim, os mapas intermediários (mapas de critérios e síntese) não podem variar de zero a um, pois o zero dá a impressão de que as unidades de planejamento são irrelevantes. Em seguida, não mostramos valores para os mapas intermediários, mas uma escala de cores contínua de 'relevante' para 'altamente relevante'. Seguindo a mesma lógica, a gradação de cores não deve começar pelo branco, pois essa cor pode dar uma ideia de não relevância. O mapa também deve ser completo: incluindo título, informações sobre parceiros e financiadores, referências geográficas e municípios ao fundo (Fig. 4). Essa lista de elementos facilita a compreensão do mapa, a divulgação, a localização rápida da área de interesse e a identificação dos responsáveis ​​pelo produto.

É importante ressaltar que todos os exemplos aqui apresentados foram resultados de consenso, consequentemente, as soluções são bastante inclusivas (e.g. ao considerar limites naturais e políticos em diferentes etapas do mapeamento). A utilização de uma abordagem participativa possibilitou a inclusão de informações técnico-científicas e as perspectivas dos tomadores de decisão e partes interessadas, melhorando a aplicabilidade dos mapas de priorização, condizentes com a realidade local. Sabe-se que apenas a incorporação da participação em um processo de mapeamento e identificação de áreas estratégicas não garante a solução da lacuna ciência-prática (Dobrovolski, 2022; Vieira et al., 2019; Watson et al., 2014). Entretanto, nosso estudo incorpora os tomadores de decisão, as partes interessadas e os cientistas que estão diretamente envolvidos com o plano de ação do território alvo e que irão implementar os públicos políticos nessas áreas estratégicas, facilitando a solução desta lacuna neste processo. Esse processo proporciona aos tomadores de decisão e stakeholders um senso de propriedade do conhecimento gerado, pois eles deixam de ser apenas clientes para se tornarem agentes ativos no processo de planejamento de conservação e restauração, reduzindo, em última análise, a lacuna entre planejamento e aplicação.
